# Supplementary material for: Autotrophic growth of Escherichia coli is achieved by a small number of genetic changes
Source: eLife. 2024 Feb 21;12:RP88793. doi: 10.7554/eLife.88793 (PMC10942610; doi:10.7554/eLife.88793)
Supplement: Supplementary file 17. [file elife-88793-supp17.xlsx]

## Sheet: Primers
Primer Name	Sequence
pgi MASC mut F	AACCAGGCACTAACGGTCAGT
pgi MASC WT F	AACCAGGCACTAACGGTCAGC
pgi MASC R	GCCCTGAGTAAAGATTTTGTGCTCATAC
rpoB MASC WT F	TCGACGACAAGATGCACGC
rpoB MASC mut F	TCGACGACAAGATGCACGT
rpoB MASC R	TAACCCGACAGCAGTGACC
crp MASC WT F	AATGGTTCTTGTCTCATTGCCACATTC
crp MASC mut F	AATGGTTCTTGTCTCATTGCCACATTA
crp MASC R	TTCTCTGAAGTGACTTGCAGACGAC
yjaH F	CATTTGTTTCTGGCAAGGC
yjaH R	GCCAACAAAAGCACGTAAA
chiA F	ATTGCTGGAACGAGTGAGGG
chiA R	TGCGTAGGACTTTTGTTTTGCA
yjbB F	TTTGGTCATTCAATTGCTTCAGG
yjbB R	GCTTGACGCGTCTTATCAGGC
pfkB F	CATGTGGCGAAAACAGATTT
pfkB R	CTTTTGAGCATAGTCGGAGA
pfkA F	AGGGAGGGTAAACGGTCTATG
pfkA R	CTTGCGGGTATATGTTGAGGG
ZWF F	TTCTATCCGGGCGAGATAAG
ZWF R	AGAGACTCACGGGTAATGAC
